# Supplementary material
Source: publisher figshare collection journal article supplement (https://brill.figshare.com/articles/dataset/_/28380716)
Supplement: Supplementary file 1 [file 1]

## *Current, Rising* Audience Research

Dr Andy Woods and Professor Polly Dalton are running a research project to understand people's experiences of *Current, Rising*.

We would be very grateful if you could complete our five-minute survey. To access it, please scan the QR code or go to:

<https://www.sfpanel.com/opera/>

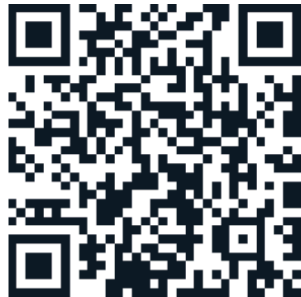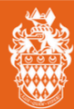

ROYAL  
HOLLOWAY  
UNIVERSITY  
OF LONDON
