# Supplementary material
Source: publisher figshare collection journal article supplement (https://brill.figshare.com/articles/dataset/_/28380716)
Supplement: Supplementary file 3 [file 1]

## grateful citation report

### R packages used

| Package       | Version    | Citation                                                                               |
|---------------|------------|----------------------------------------------------------------------------------------|
| base          | 4.3.3      | R Core Team (2024)                                                                     |
| brant         | 0.3.0      | Schlegel & Steenbergen (2020)                                                          |
| brms          | 2.21.0     | Bürkner (2017); Bürkner (2018); Bürkner (2021)                                         |
| car           | 3.1.2      | Fox & Weisberg (2019a)                                                                 |
| corrr         | 0.4.4      | Kuhn, Jackson & Cimentada (2022)                                                       |
| devtools      | 2.4.5      | Wickham et al. (2022)                                                                  |
| effects       | 4.2.2      | Fox (2003); Fox & Hong (2009); Fox & Weisberg (2018); Fox & Weisberg (2019b)           |
| emmeans       | 1.10.1     | Lenth (2024)                                                                           |
| FSA           | 0.9.5      | Ogle et al. (2023)                                                                     |
| ggdist        | 3.3.2      | Kay (2024a); Kay (2024b)                                                               |
| ggeffects     | 1.5.1      | Lüdecke (2018)                                                                         |
| ggpubr        | 0.6.0      | Kassambara (2023a)                                                                     |
| ggthemes      | 5.1.0      | Arnold (2024)                                                                          |
| gmodels       | 2.19.1     | Warnes et al. (2024)                                                                   |
| gt            | 0.10.1     | Iannone et al. (2024)                                                                  |
| gtsummary     | 1.7.2      | Sjoberg et al. (2021)                                                                  |
| lattice       | 0.22.5     | Sarkar (2008)                                                                          |
| lme4          | 1.1.35.2   | Bates et al. (2015)                                                                    |
| MASS          | 7.3.60.0.1 | Venables & Ripley (2002)                                                               |
| multcomp      | 1.4.25     | Hothorn, Bretz & Westfall (2008)                                                       |
| ordinal       | 2023.12.4  | Christensen (2023)                                                                     |
| patchwork     | 1.2.0      | Pedersen (2024)                                                                        |
| performance   | 0.11.0     | Lüdecke et al. (2021)                                                                  |
| psych         | 2.4.3      | William Revelle (2024)                                                                 |
| RColorBrewer  | 1.1.3      | Neuwirth (2022)                                                                        |
| reshape2      | 1.4.4      | Wickham (2007)                                                                         |
| rmarkdown     | 2.26       | Xie, Allaire & Golemund (2018); Xie, Dervieux & Riederer (2020); Allaire et al. (2024) |
| rstatix       | 0.7.2      | Kassambara (2023b)                                                                     |
| RVAideMemoire | 0.9.83.7   | HERVE (2023)                                                                           |

| Package   | Version | Citation                          |
|-----------|---------|-----------------------------------|
| scales    | 1.3.0   | Wickham, Pedersen & Seidel (2023) |
| sjPlot    | 2.8.15  | Lüdecke (2023)                    |
| tidyverse | 2.0.0   | Wickham et al. (2019)             |
| viridis   | 0.6.5   | Garnier et al. (2024)             |

## Package citations

Allaire J, Xie Y, Dervieux C, McPherson J, Luraschi J, Ushey K, Atkins A, Wickham H, Cheng J, Chang W, Iannone R. 2024. *rmarkdown: Dynamic documents for r*.

Arnold JB. 2024. *ggthemes: Extra themes, scales and geoms for “ggplot2”*.

Bates D, Mächler M, Bolker B, Walker S. 2015. Fitting linear mixed-effects models using lme4. *Journal of Statistical Software* 67:1–48. DOI: [10.18637/jss.v067.i01](https://doi.org/10.18637/jss.v067.i01).

Bürkner P-C. 2017. brms: An R package for Bayesian multilevel models using Stan. *Journal of Statistical Software* 80:1–28. DOI: [10.18637/jss.v080.i01](https://doi.org/10.18637/jss.v080.i01).

Bürkner P-C. 2018. Advanced Bayesian multilevel modeling with the R package brms. *The R Journal* 10:395–411. DOI: [10.32614/RJ-2018-017](https://doi.org/10.32614/RJ-2018-017).

Bürkner P-C. 2021. Bayesian item response modeling in R with brms and Stan. *Journal of Statistical Software* 100:1–54. DOI: [10.18637/jss.v100.i05](https://doi.org/10.18637/jss.v100.i05).

Christensen RHB. 2023. *Ordinal—regression models for ordinal data*.

Fox J. 2003. Effect displays in R for generalised linear models. *Journal of Statistical Software* 8:1–27. DOI: [10.18637/jss.v008.i15](https://doi.org/10.18637/jss.v008.i15).

Fox J, Hong J. 2009. Effect displays in R for multinomial and proportional-odds logit models: Extensions to the effects package. *Journal of Statistical Software* 32:1–24. DOI: [10.18637/jss.v032.i01](https://doi.org/10.18637/jss.v032.i01).

Fox J, Weisberg S. 2018. Visualizing fit and lack of fit in complex regression models with predictor effect plots and partial residuals. *Journal of Statistical Software* 87:1–27. DOI: [10.18637/jss.v087.i09](https://doi.org/10.18637/jss.v087.i09).

Fox J, Weisberg S. 2019a. *An R companion to applied regression*. Thousand Oaks CA: Sage.

Fox J, Weisberg S. 2019b. *An r companion to applied regression*. Thousand Oaks CA: Sage.

Garnier, Simon, Ross, Noam, Rudis, Robert, Camargo, Pedro A, Sciaini, Marco, Scherer, Cédric. 2024. *viridis(Lite) - colorblind-friendly color maps for r*. DOI: [10.5281/zenodo.4679423](https://doi.org/10.5281/zenodo.4679423).

HERVE M. 2023. *RVAideMemoire: Testing and plotting procedures for biostatistics*.

Hothorn T, Bretz F, Westfall P. 2008. Simultaneous inference in general parametric models. *Biometrical Journal* 50:346–363.

Iannone R, Cheng J, Schloerke B, Hughes E, Lauer A, Seo J. 2024. *gt: Easily create presentation-ready display tables*.

Kassambara A. 2023a. *ggpubr: “ggplot2” based publication ready plots*.

Kassambara A. 2023b. *rstatix: Pipe-friendly framework for basic statistical tests*.

Kay M. 2024a. ggdist: Visualizations of distributions and uncertainty in the grammar of graphics. *IEEE Transactions on Visualization and Computer Graphics* 30:414–424. DOI: [10.1109/TVCG.2023.3327195](https://doi.org/10.1109/TVCG.2023.3327195).

Kay M. 2024b. *ggdist: Visualizations of distributions and uncertainty*. DOI: [10.5281/zenodo.3879620](https://doi.org/10.5281/zenodo.3879620).

Kuhn M, Jackson S, Cimentada J. 2022. *corrr: Correlations in r*.

Lenth RV. 2024. *emmeans: Estimated marginal means, aka least-squares means*.

Lüdtke D. 2018. ggeffects: Tidy data frames of marginal effects from regression models. *Journal of Open Source Software* 3:772. DOI: [10.21105/joss.00772](https://doi.org/10.21105/joss.00772).

Lüdtke D. 2023. *sjPlot: Data visualization for statistics in social science*.

Lüdtke D, Ben-Shachar MS, Patil I, Waggoner P, Makowski D. 2021. performance: An R package for assessment, comparison and testing of statistical models. *Journal of Open Source Software* 6:3139. DOI: [10.21105/joss.03139](https://doi.org/10.21105/joss.03139).

Neuwirth E. 2022. *RColorBrewer: ColorBrewer palettes*.

Ogle DH, Doll JC, Wheeler AP, Dinno A. 2023. *FSA: Simple fisheries stock assessment methods*.

Pedersen TL. 2024. *patchwork: The composer of plots*.

R Core Team. 2024. *R: A language and environment for statistical computing*. Vienna, Austria: R Foundation for Statistical Computing.

Sarkar D. 2008. *Lattice: Multivariate data visualization with r*. New York: Springer.

Schlegel B, Steenbergen M. 2020. *brant: Test for parallel regression assumption*.

Sjöberg DD, Whiting K, Curry M, Lavery JA, Larmarange J. 2021. Reproducible summary tables with the gtsummary package. *The R Journal* 13:570–580. DOI: [10.32614/RJ-2021-053](https://doi.org/10.32614/RJ-2021-053).

Venables WN, Ripley BD. 2002. *Modern applied statistics with s*. New York: Springer.

Warnes GR, Bolker B, Lumley T, Johnson RC, Jain N, Schwartz M, Rogers J. 2024. *gmodels: Various r programming tools for model fitting*.

Wickham H. 2007. [Reshaping data with the reshape package](#). *Journal of Statistical Software* 21:1–20.

Wickham H, Averick M, Bryan J, Chang W, McGowan LD, François R, Golemund G, Hayes A, Henry L, Hester J, Kuhn M, Pedersen TL, Miller E, Bache SM, Müller K, Ooms J, Robinson D, Seidel DP, Spinu V, Takahashi K, Vaughan D, Wilke C, Woo K, Yutani H. 2019. Welcome to the tidyverse. *Journal of Open Source Software* 4:1686. DOI: [10.21105/joss.01686](#).

Wickham H, Hester J, Chang W, Bryan J. 2022. [devtools: Tools to make developing r packages easier](#).

Wickham H, Pedersen TL, Seidel D. 2023. [scales: Scale functions for visualization](#).

William Revelle. 2024. [psych: Procedures for psychological, psychometric, and personality research](#). Evanston, Illinois: Northwestern University.

Xie Y, Allaire JJ, Golemund G. 2018. [R markdown: The definitive guide](#). Boca Raton, Florida: Chapman; Hall/CRC.

Xie Y, Dervieux C, Riederer E. 2020. [R markdown cookbook](#). Boca Raton, Florida: Chapman; Hall/CRC.
