# Supplementary material
Source: publisher figshare collection journal article supplement (https://brill.figshare.com/articles/dataset/_/28380716)
Supplement: Supplementary file 4 [file 1]

## Experience presence analyses

The summary of the model,  $\text{experiencepresence} \sim 1 + \text{age} + \text{gender} + \text{elementpresence} * \text{element}$  (where  $\text{elementpresence}$  is the proxy-presence for each Element;  $RSS = 1240.0$ ), is shown in Supplementary Table S1. There was no significant impact of the interaction  $\text{msi}:\text{elementpresence}$ ,  $RSS = 1241.2$ ,  $F = 0.84$ ,  $df = 4$ ,  $p > 0.05$ . Of interest though,  $\text{ElementPresence}$  positively predicted  $\text{ExperiencePresence}$  ratings ( $\beta = 0.15$ ,  $CI = 0.09\text{--}0.22$ ). This lends support to the notion that our above dependent variable,  $\text{ElementPresence}$ , functioned as a proxy for assessing each element's impact on  $\text{ExperiencePresence}$ . The relatively low estimate here may in part be due to an impact of a ceiling effect, as seen in Supplementary Fig. S1. Also, the restricted range of elements' presence score ratings may also have contributed to this (emmeans ranged from 4.01–4.66 on a 5 point scale, Fig. 3; e.g., there may be no relationship between IQ scores and mathematical ability for members of the high IQ society, Mensa, but such a relationship may exist in the general population; see, Kantowitz, Roediger and Elmes, 2015, p. 42).

**Table S1.**

Summary of the Presence model

| Predictors                  | Presence  |            |                  |
|-----------------------------|-----------|------------|------------------|
|                             | Estimates | CI         | <i>p</i>         |
| (Intercept)                 | 2.44      | 2.12–2.77  | <b>&lt;0.001</b> |
| element-presence            | 0.15      | 0.09–0.22  | <b>&lt;0.001</b> |
| element [free-roam-walking] | -0.15     | -0.56–0.26 | 0.471            |
| element [audience-avatars]  | -0.13     | -0.52–0.26 | 0.506            |
| element [floor-vibration]   | 0.10      | -0.29–0.49 | 0.612            |
| element [virtual-hands]     | 0.09      | -0.27–0.46 | 0.619            |
| age                         | -0.00     | -0.00–0.00 | <b>0.042</b>     |
| gender [1]                  | -0.10     | -0.14–0.06 | <b>&lt;0.001</b> |

|                                          |               |              |       |
|------------------------------------------|---------------|--------------|-------|
| element-presence × element               | 0.04          | -0.05 – 0.12 | 0.423 |
| [free-roam-walking]                      |               |              |       |
| element-presence × element               | 0.04          | -0.05–0.12   | 0.365 |
| [audience-avatars]                       |               |              |       |
| element-presence × element               | -0.01         | -0.10–0.07   | 0.734 |
| [floor-vibration]                        |               |              |       |
| element-presence × element               | -0.00         | -0.08–0.08   | 0.955 |
| [virtual-hands]                          |               |              |       |
| Observations                             | 3462          |              |       |
| R <sup>2</sup> / R <sup>2</sup> adjusted | 0.061 / 0.058 |              |       |

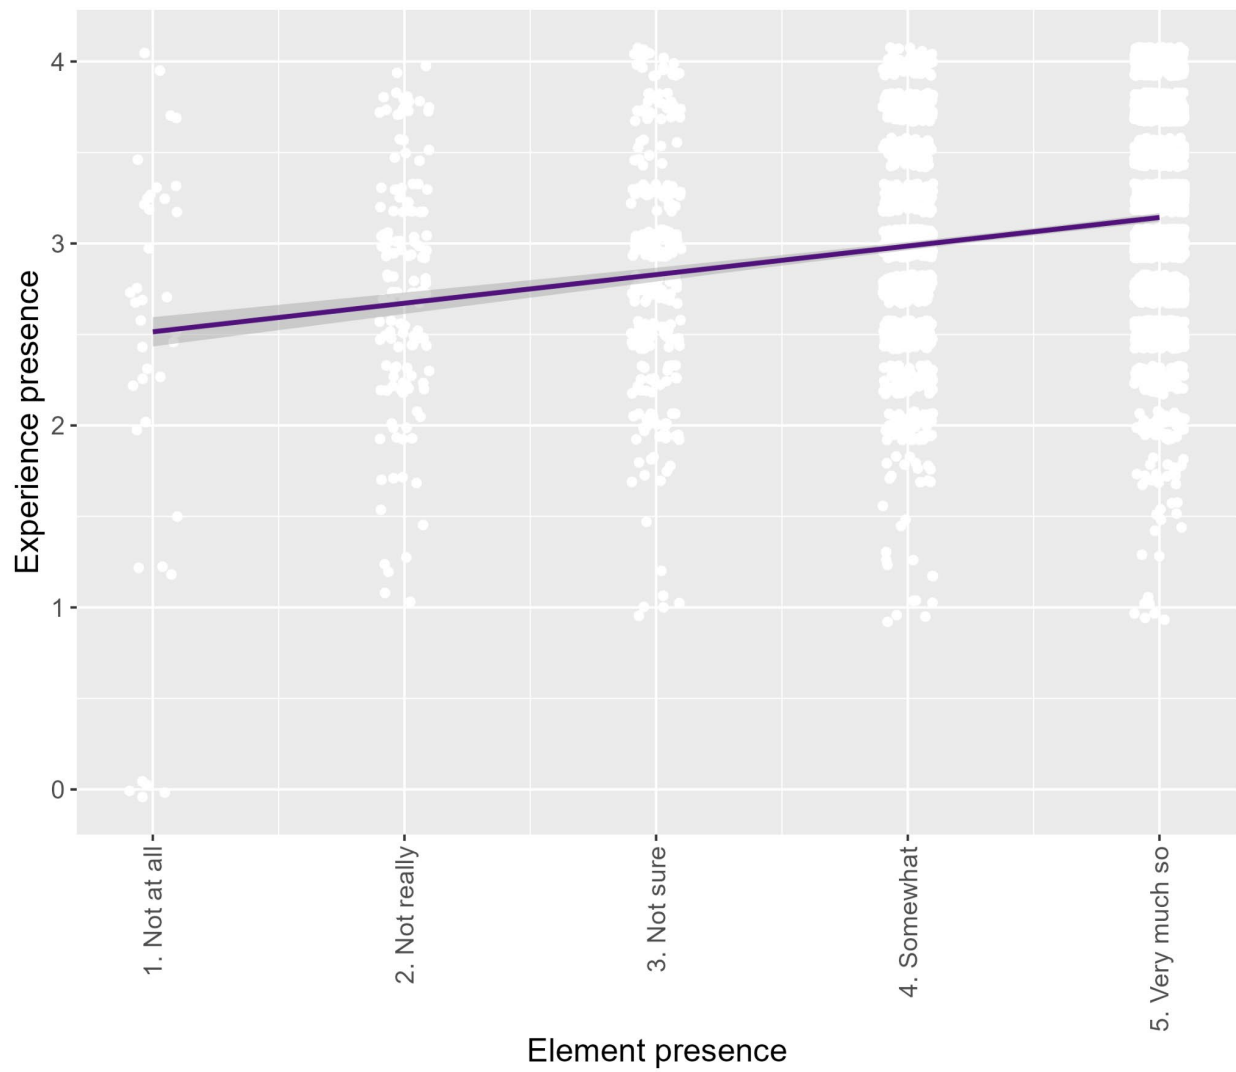

**Figure S1.** Depicting the relationship between overall experience presence (derived from averaging the 4 separate measuring different aspects of presence) and reported presence for each element. The line indicates the estimated regression line, and the shaded area indicates the 95% confidence interval of this estimate. The dots represent data points that have been jittered (via `geom_jitter`, width and height .08).
