# Supplementary material
Source: publisher figshare collection journal article supplement (https://brill.figshare.com/articles/dataset/_/28380716)
Supplement: Supplementary file 6 [file 1]

# **Going Beyond the Ordinary — User Perceptions of the Impact of Multisensory Elements on Presence in Virtual Reality at the Royal Opera House**

**Andy T. Woods<sup>1,2,\*</sup>, Marusa Levstek<sup>1,2</sup>, Jamie Moffatt<sup>2</sup>, Mark Lycett<sup>1,3</sup>,  
Laryssa Whittaker<sup>1,4</sup> and Polly Dalton<sup>1,2</sup>**

<sup>1</sup> StoryFutures, Royal Holloway, University of London, Egham, TW20 0EX, UK

<sup>2</sup> Department of Psychology, Royal Holloway, University of London, Egham. TW20 0EX, UK

<sup>3</sup> School of Business Management, Royal Holloway, University of London, Egham. TW20 0EX,  
UK

<sup>4</sup> Department of Media Arts, Royal Holloway, University of London, Egham, TW20 0EX, UK

\*Corresponding author; e-mail: andy.woods@rhul.ac.uk

**Supplementary material**
